# Supplementary material for: A novel 3D porous pseudographite/Si/Ni composite anode material fabricated by a facile method
Source: Royal Society of Chemistry journal article supplement (doi:10.1039/d0dt00856g), 2020-01-01
Supplement: d0dt00856g1.pdf [file d0dt00856g1.pdf]

## Supporting Information

**Title (A Novel 3D Porous Pseudographite/Si/Ni Composite Anode Materials Fabricated by a Facile method)**

Weiming Su<sup>a,b</sup>, Ruchao Wan<sup>a,b</sup>, Yue Liang<sup>a,b</sup>, Yinze Zuo<sup>a,b,\*</sup> and Yuefeng Tang<sup>a,b,c,\*</sup>

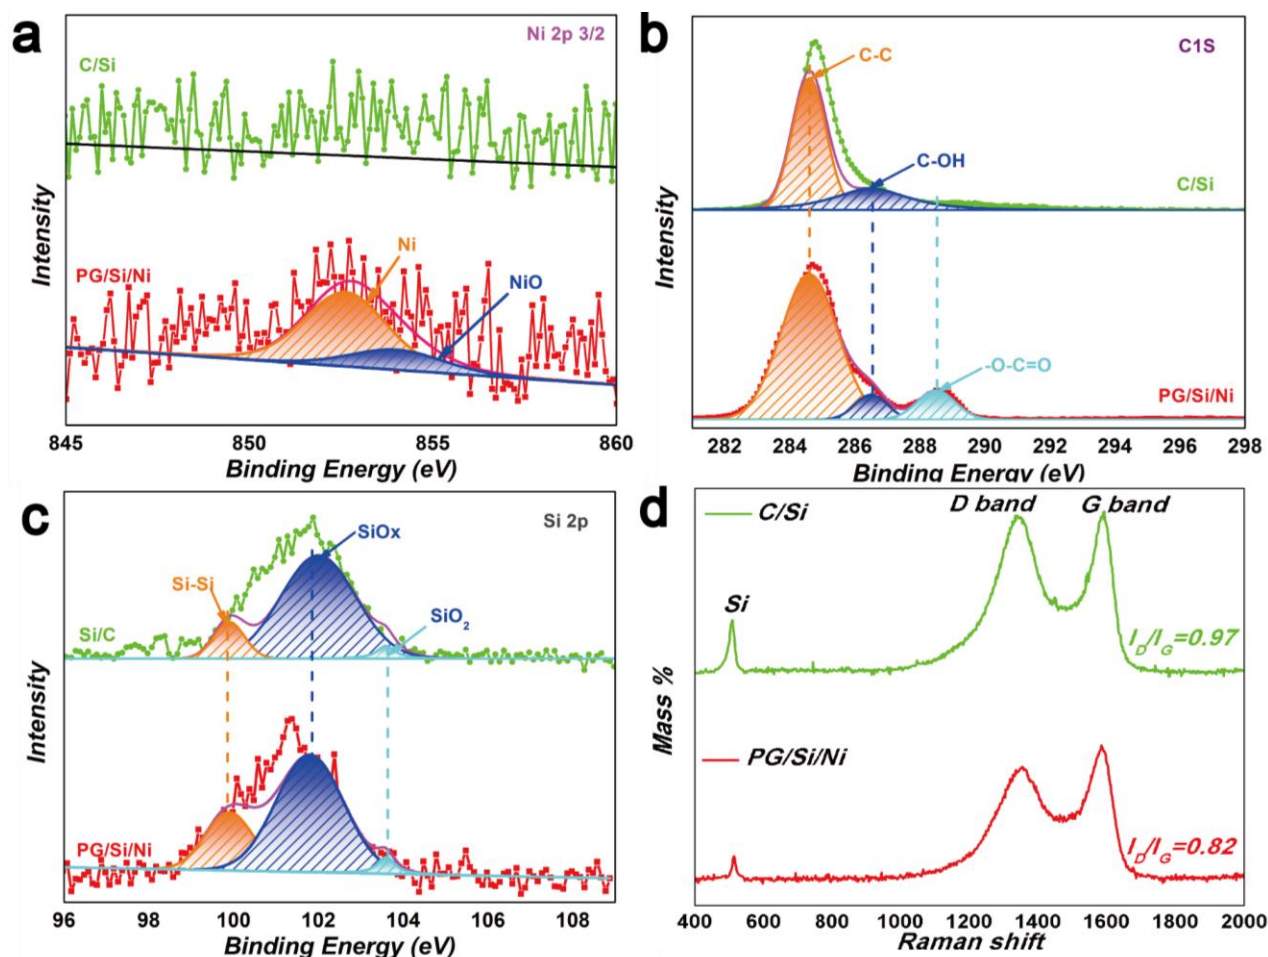

Fig. S1. High-resolution XPS spectra of the C/Si and PG/Si/Ni: (a) Ni 2p<sub>3/2</sub>, (b) Si 2p,

(c) C 1s, (d) Raman spectra of the C/Si and PG/Si/Ni composite.

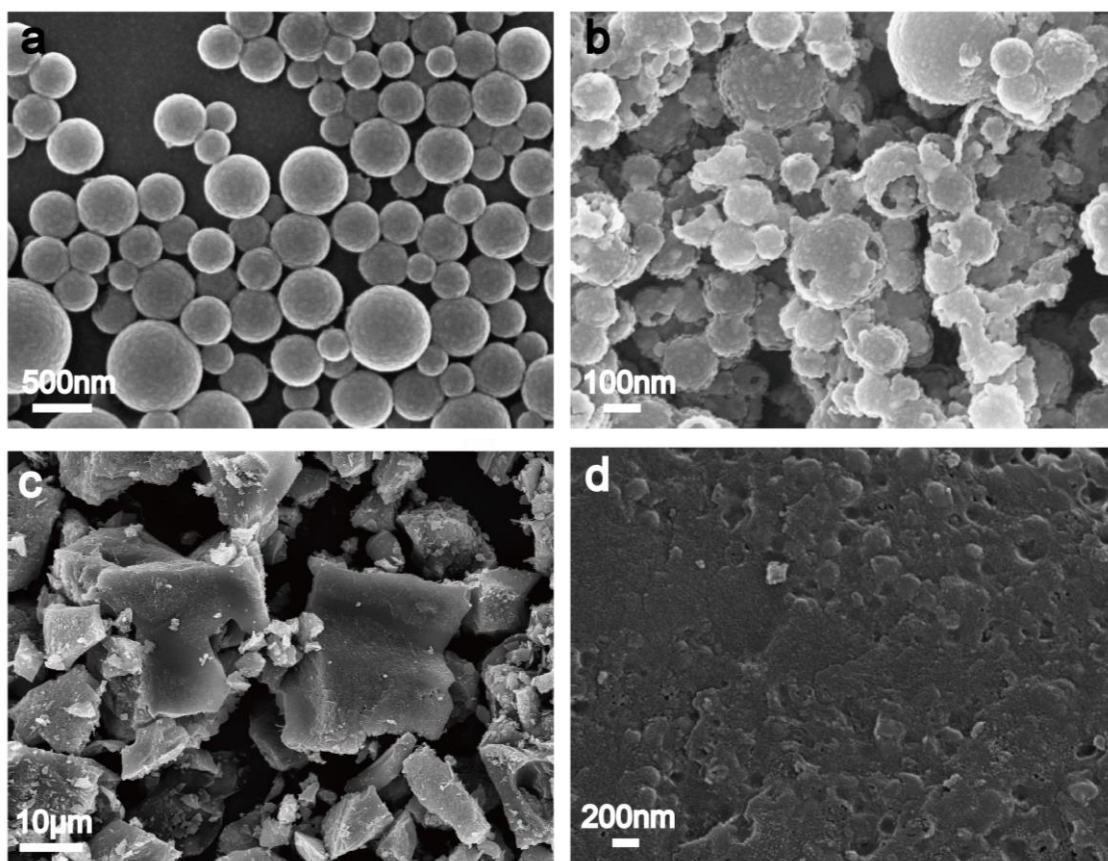

Fig. S2. SEM images of (a) as-prepared  $\text{SiO}_2$  nanospheres. (c) as-prepared Si nanospheres. (b,c) C/Si composite.

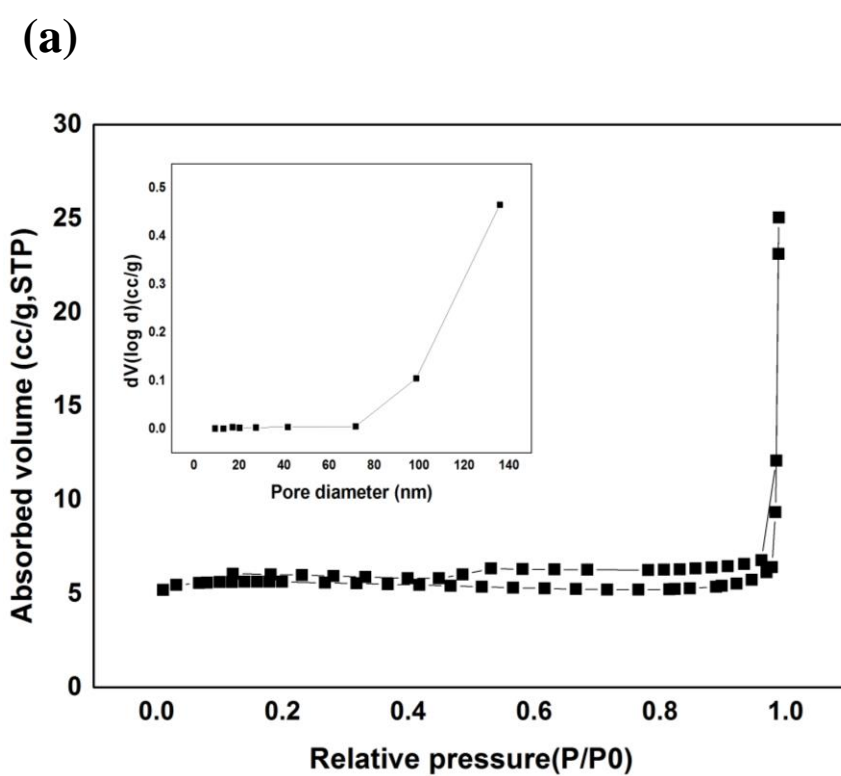

(b)

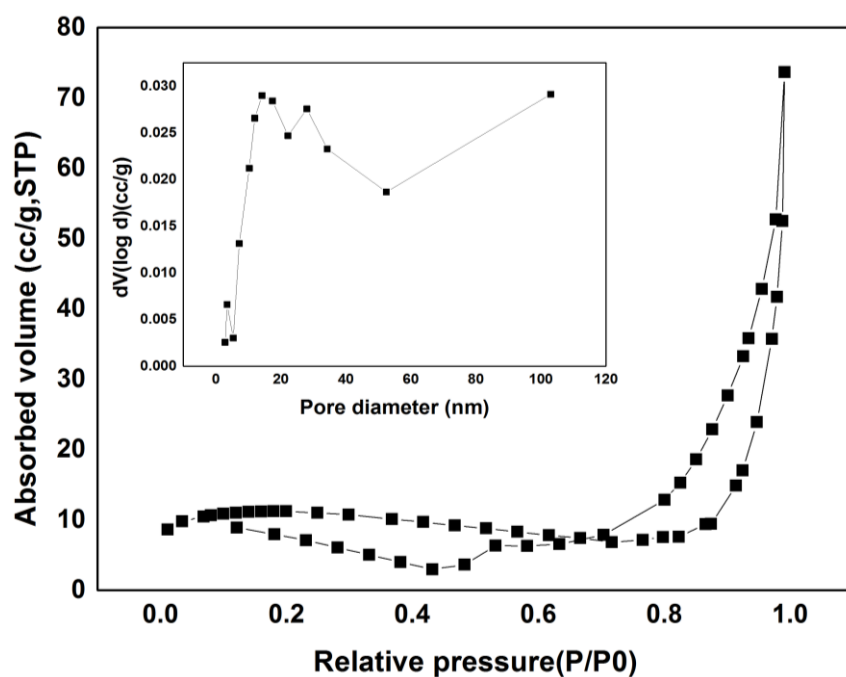

Fig. S3. N<sub>2</sub> adsorption–desorption isotherms of samples: (a) C/Si, (b) PG/Si/Ni. The inset in each figure shows the relevant pore size distribution calculated by the BJH formula.

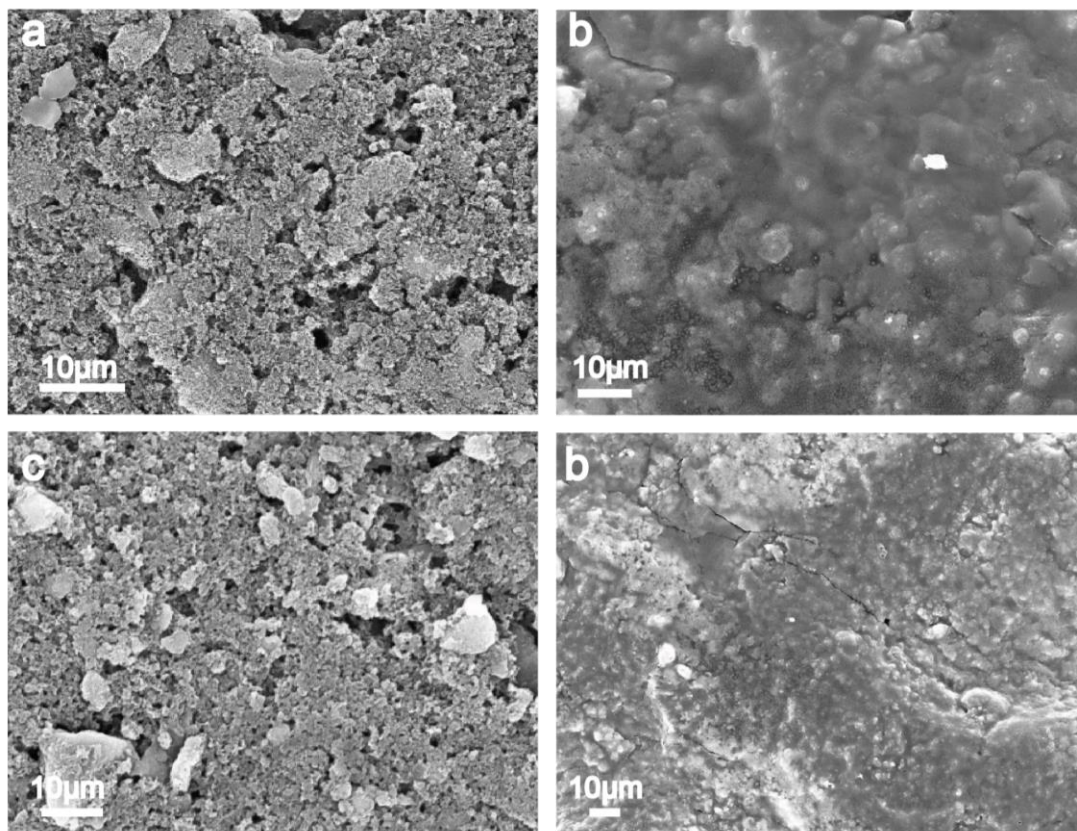

Fig. S4. SEM images of C/Si composite, (a) before cycling, and (b) after 2000 cycles; SEM images of PG/Si/Ni hybrid composite, (c) before cycling and (d) after 2000 cycles.

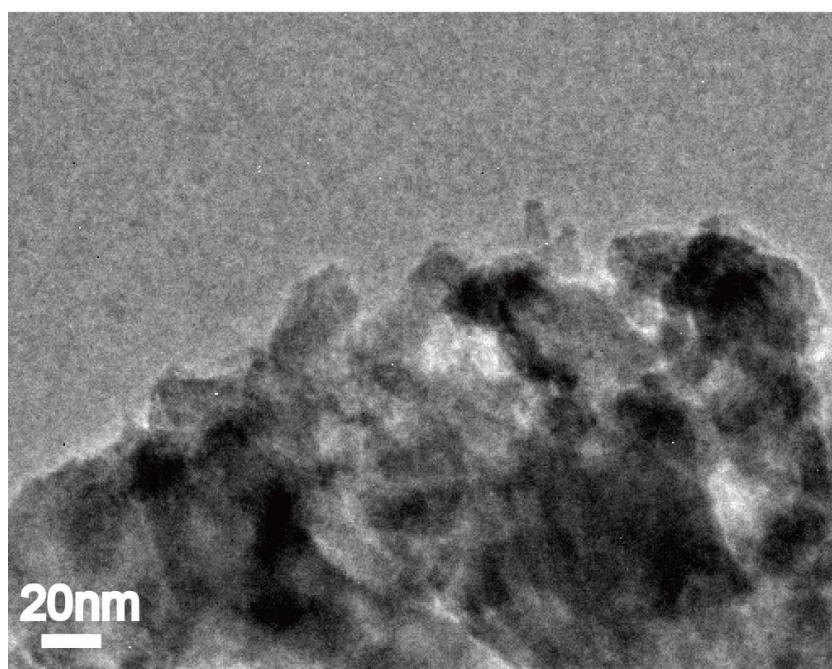

Fig. S5 TEM image of the Ni distribution.

Table S1. N<sub>2</sub> adsorption-desorption isothermal analysis of C/Si and PG/Si/Ni.

| Sample   | D <sub>average</sub><br>(nm) | Surface Area <sub>total</sub><br>(m <sup>2</sup> /g) |
|----------|------------------------------|------------------------------------------------------|
| C/Si     | 64.4                         | 16.9                                                 |
| PG/Si/Ni | 19.3                         | 79.8                                                 |

Table S2. Fitting results of cells with C/Si and PG/Si/Ni as anodes

| Sample   | R <sub>s</sub><br>[Ω] | R <sub>ct</sub><br>[Ω] | W    |
|----------|-----------------------|------------------------|------|
| C/Si     | 25.35                 | 1923                   | 3497 |
| PG/Si/Ni | 3.887                 | 321                    | 499  |
